# Supplementary material for: Tumor and immune remodeling following radiotherapy in human renal cell carcinoma
Source: HighWire-hosted journal article supplement (doi:10.1136/jitc-2022-006392), 2023-04-01
Supplement: jitc-2022-006392supp001_data_supplement.pdf [file jitc-2022-006392supp001_data_supplement.pdf]

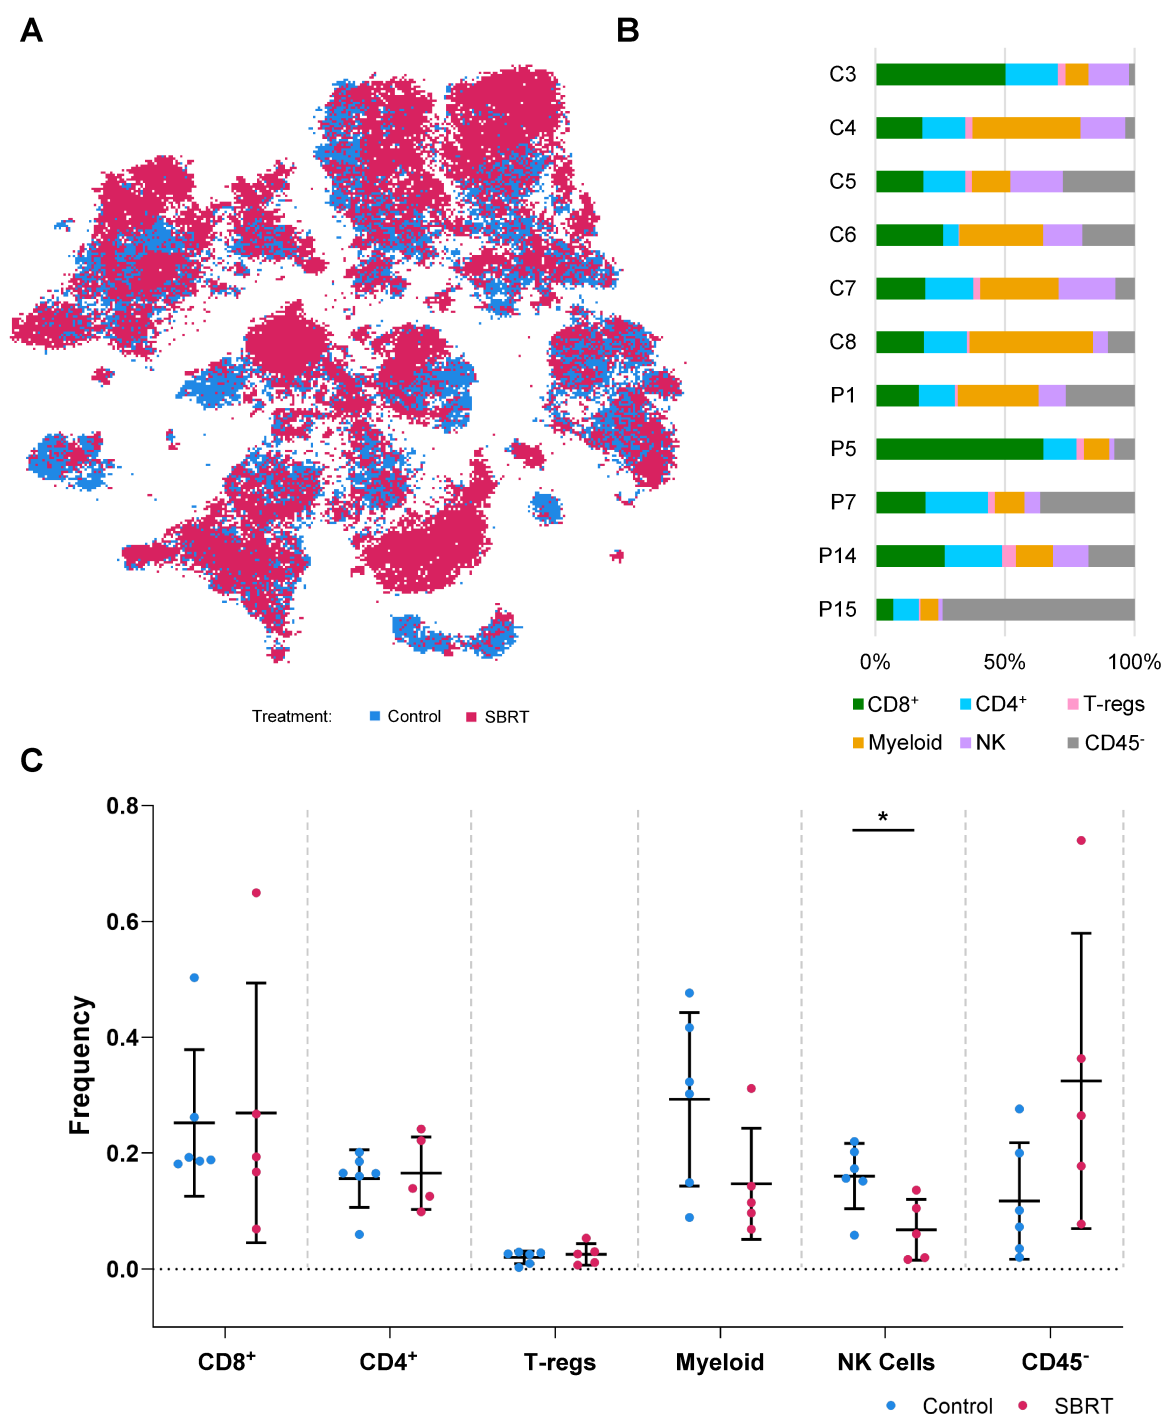

**Supplemental Figure 1. Comparison of control vs SBRT treated cells by spectral flow cytometry.** (A) t-SNE overlay plot comprising all cell subsets used in the analysis (see also figure 1B-D). (B) Frequency of major cell types within specified patient tumors. Colors and labels denote the major cell subsets. (C) Frequency of cells in each major cell type within control (blue) and SBRT-treated (red) patient samples. Statistical significance was calculated using multiple unpaired t-tests (\* $p < 0.05$ ). Data presented as mean  $\pm$  standard deviation.

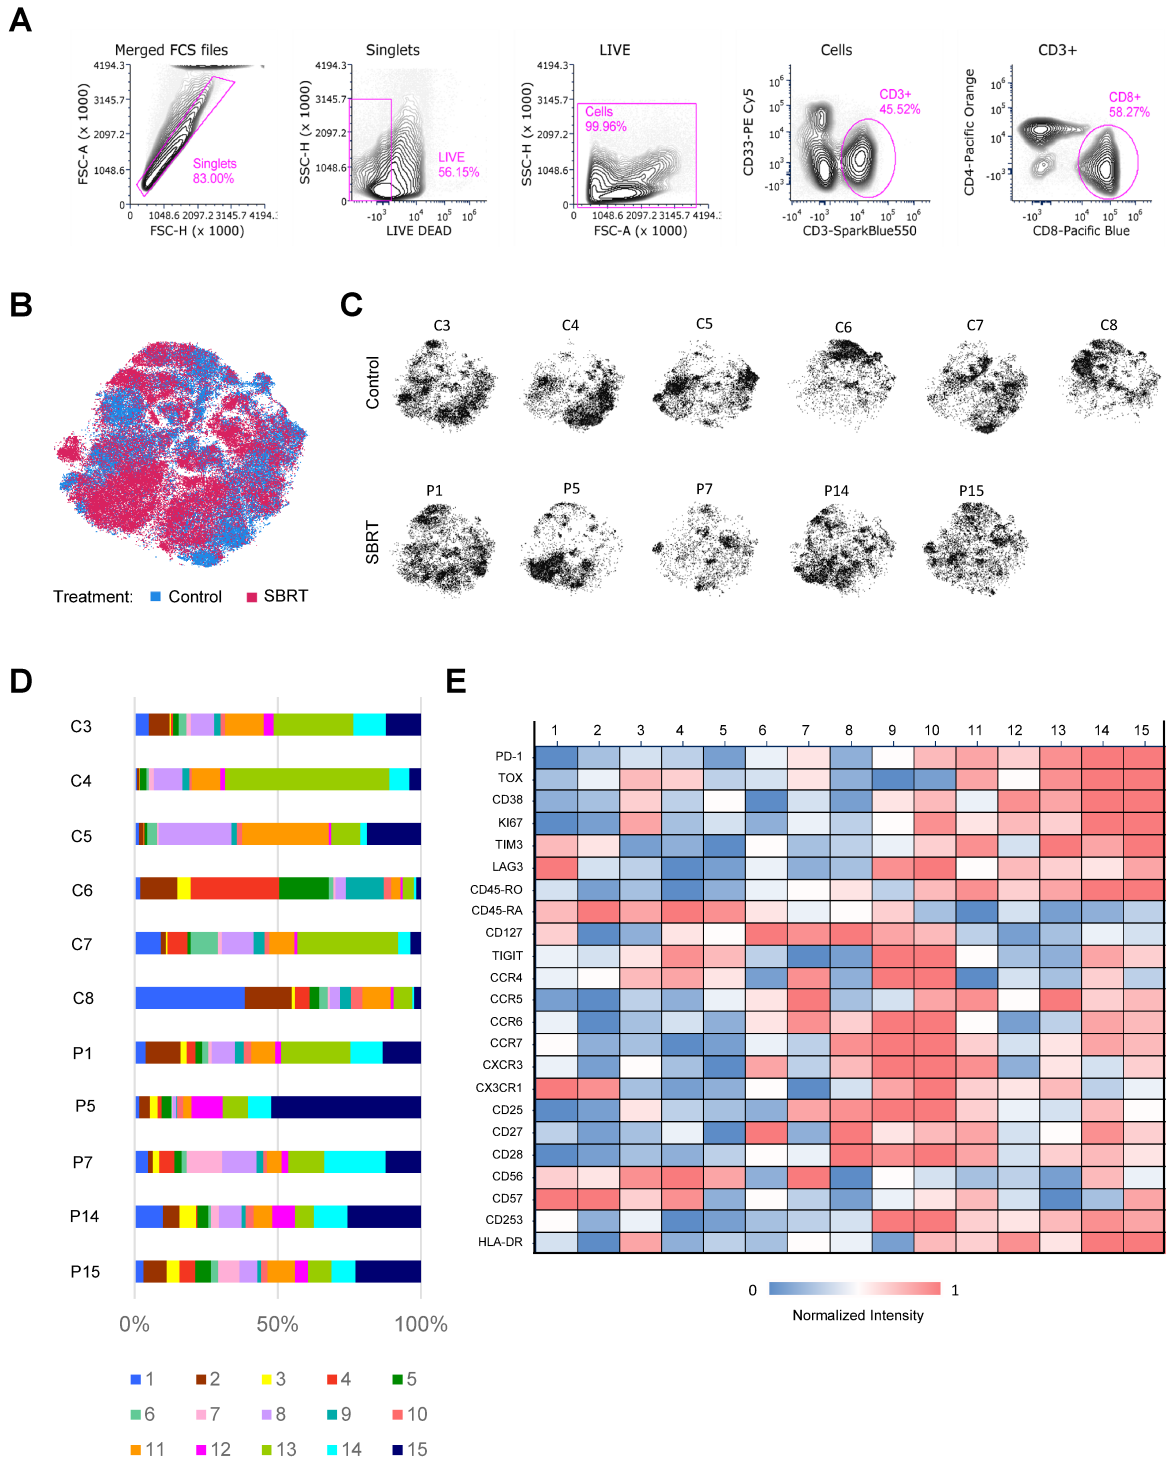

**Supplemental Figure 2. Analysis of CD8<sup>+</sup> T cells by spectral flow cytometry.** (A) Gating strategy to export out CD8<sup>+</sup> T cells from each patient sample for further analysis. (B) t-SNE overlay plot for CD8<sup>+</sup> T cells used in the analysis. (C) Individual t-SNE plots for indicated samples. (D) Frequency of CD8<sup>+</sup> T cell clusters within specified patient tumors. Colors and labels indicate the fifteen identified clusters by FlowSOM hierarchical clustering (see also figure 2A). (E) Heatmap showing expression of markers used for generating FlowSOM clusters and t-SNE plots for CD8<sup>+</sup> T cells in all identified clusters.

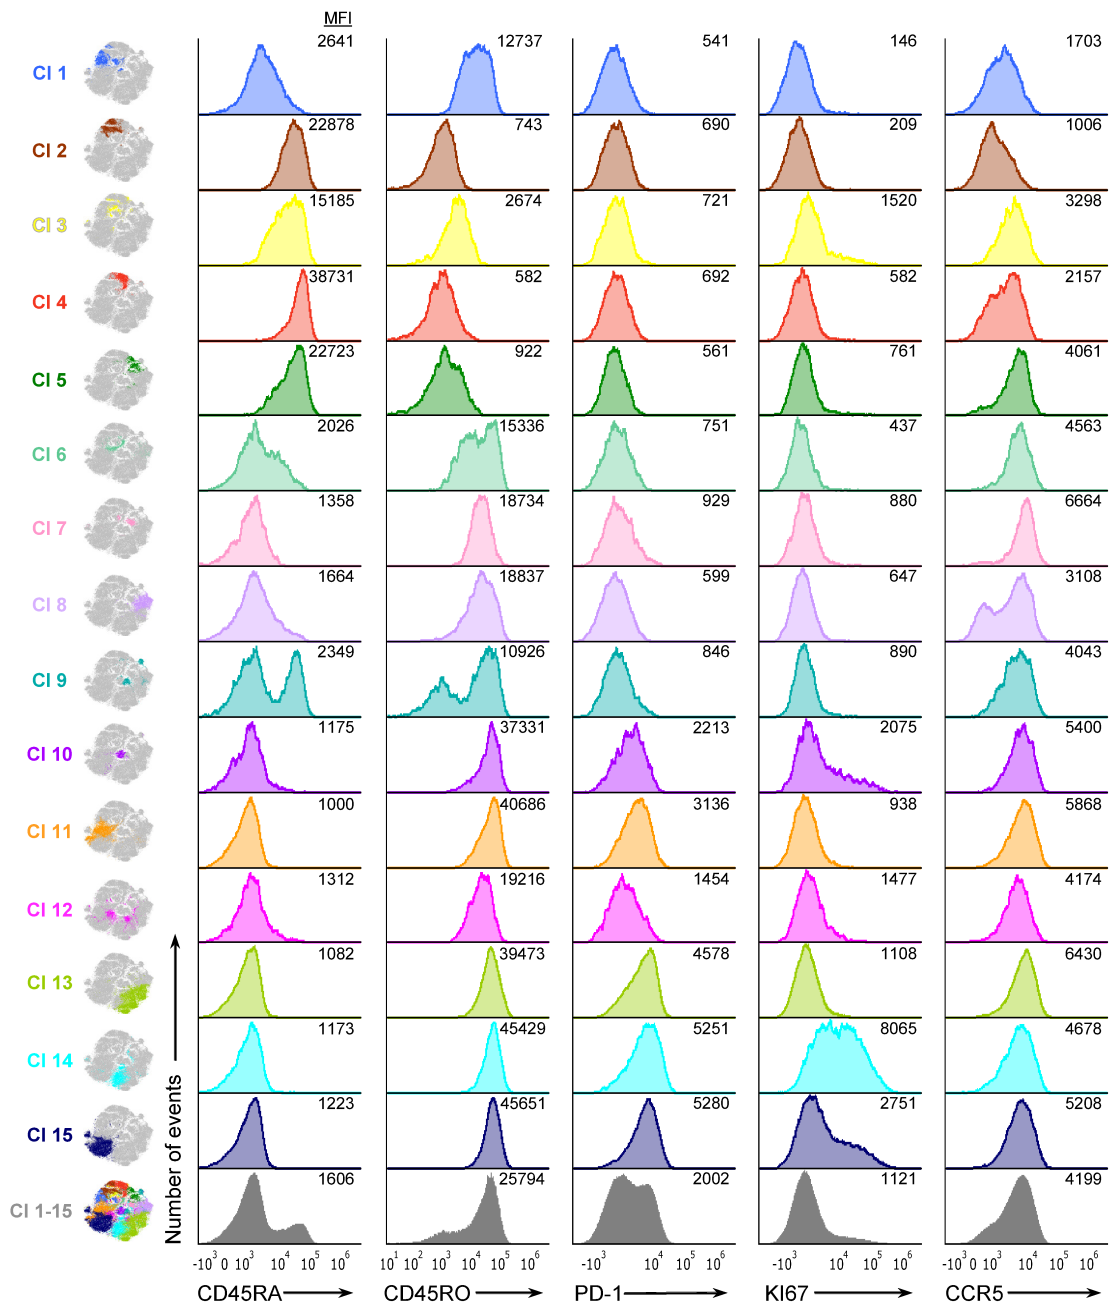

**Supplemental Figure 3. Histogram analysis of all CD8<sup>+</sup> T cell clusters identified by FlowSOM.** Single parameter histograms are shown for comparison across 15 clusters identified by FlowSOM analysis. Numbers indicate median fluorescent intensity (MFI) value. Histogram for cumulative expression of listed markers in all CD8<sup>+</sup> T cells is also included (CI 1-15).

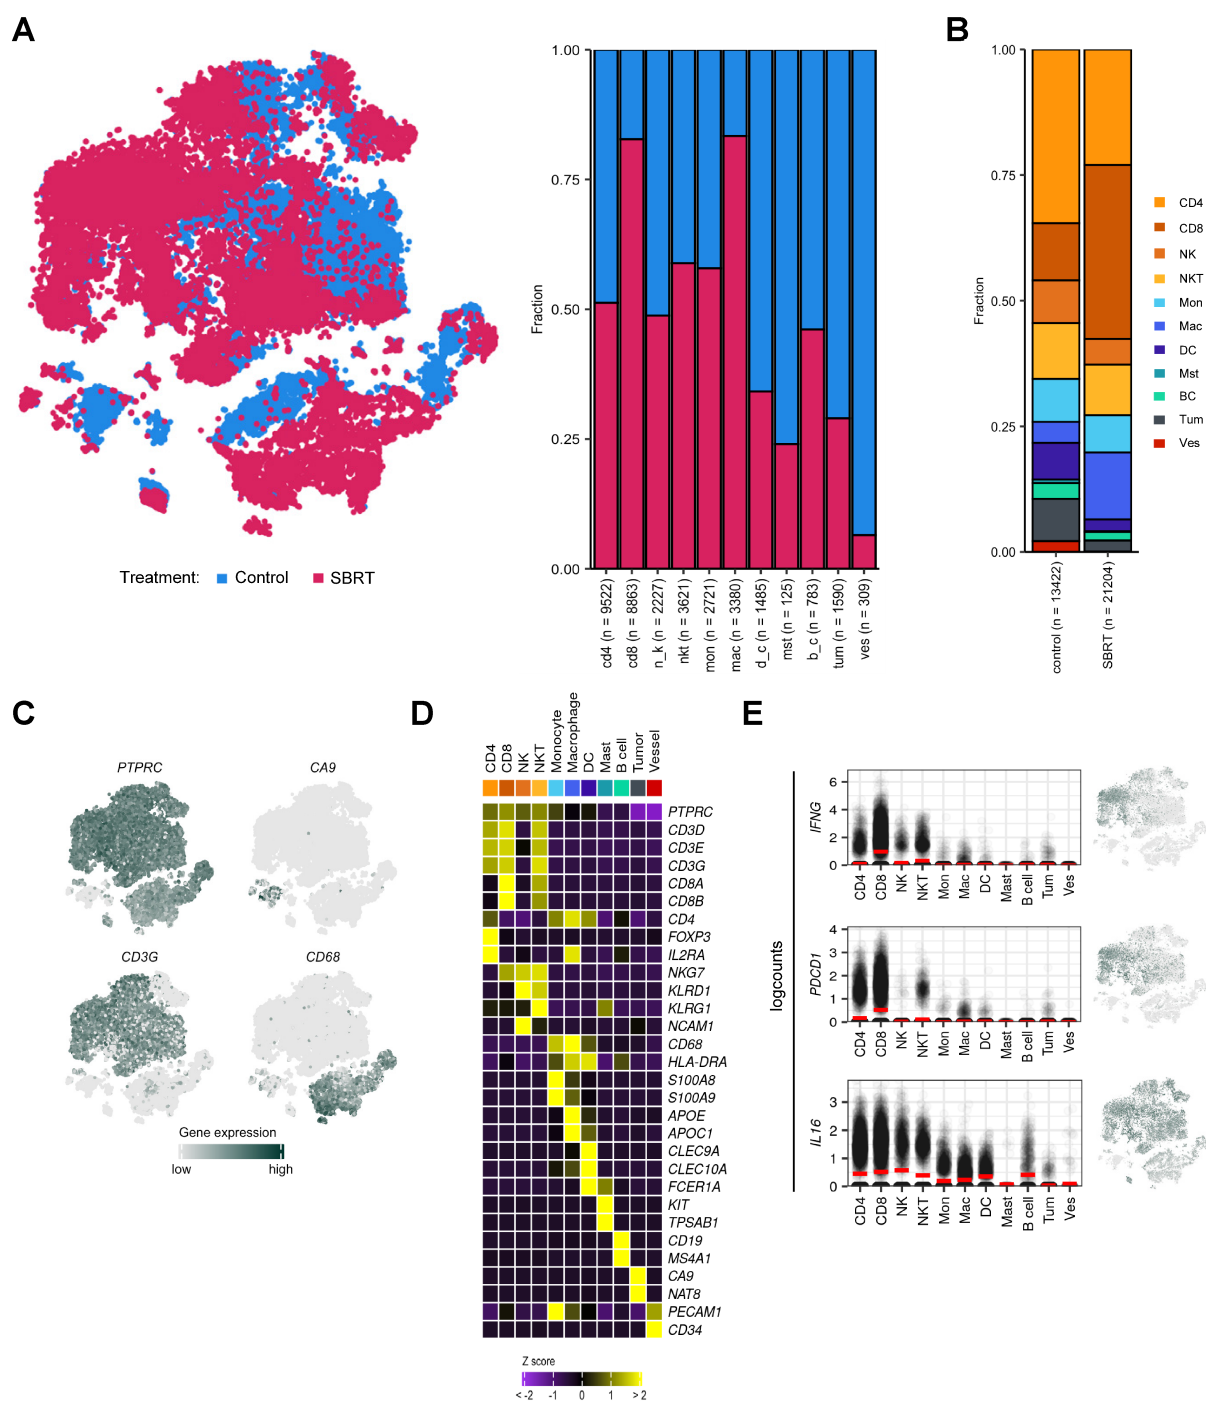

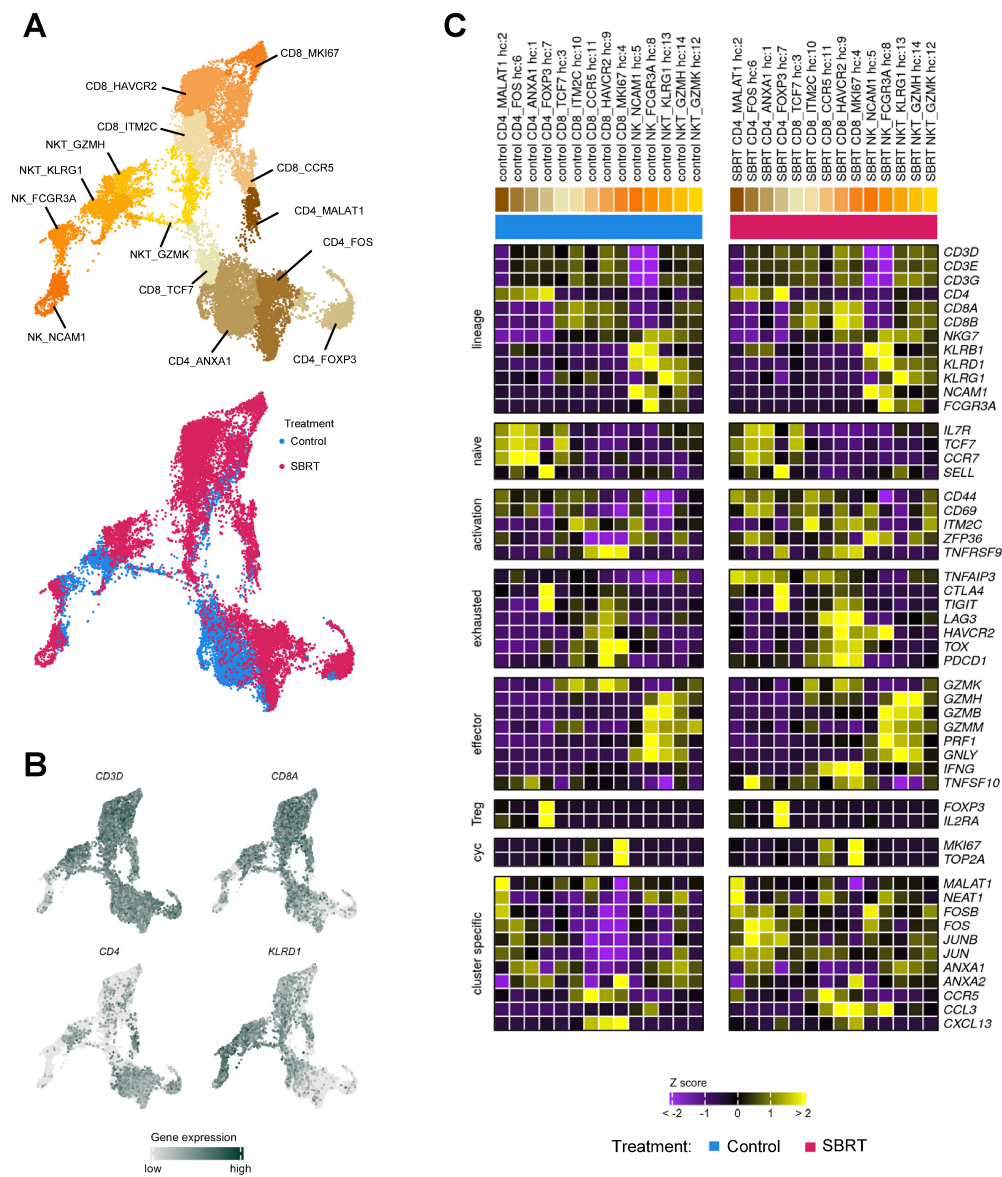

**Supplemental Figure 5. Subclassification of lymphocytes.** (A) UMAP recalculated for lymphocyte subset from the parent data. Top, lymphocyte reclustering into 14 subclusters. Bottom, distribution of cells by treatment group. (B) Localized gene expression for indicated genes within the lymphocyte UMAP. (C) Heatmaps showing expression of genes used for lymphocyte subclassification, divided by treatment group.

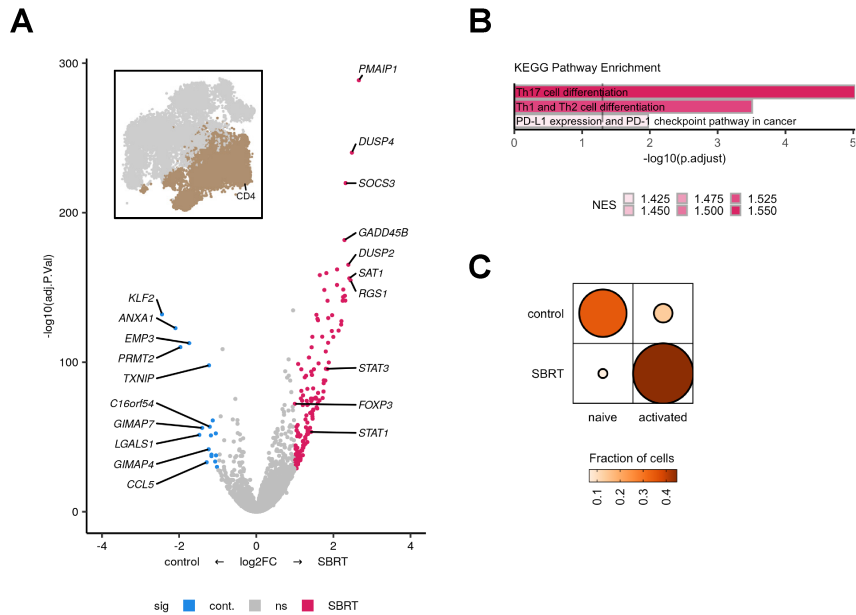

**Supplemental Figure 6. Analysis of CD4<sup>+</sup> T cells.** (A) Volcano plot showing DGE within CD4<sup>+</sup> T cells between treatment groups. Color is differential gene expression,  $abs(\log_2FC) > 1$ ;  $adj.p < 0.05$ . Inset, CD4<sup>+</sup> T cells subset from lymphocyte t-SNE. (B) GSEA of KEGG pathways. Opacity is NES. All shown pathways are significant,  $p.adjust < 0.05$ . (C) Visualized chi square of naive CD4<sup>+</sup> T cells versus treatment group. Size and color show relative abundance after controlling for different total CD4<sup>+</sup> T cell numbers between treatment groups.

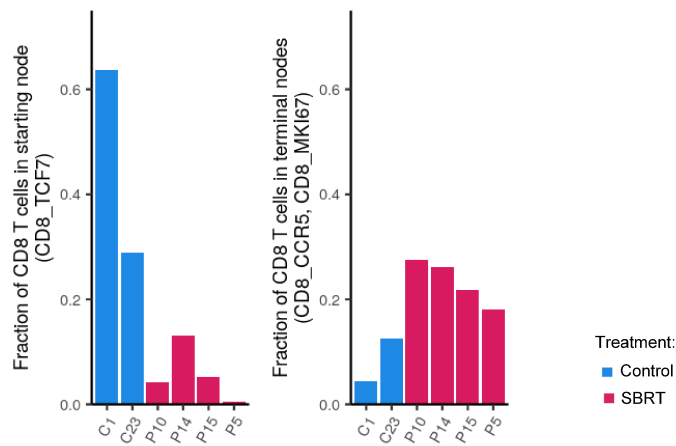

**Supplemental Figure 7. Analysis of CD8<sup>+</sup> T cell maturation across individual patient samples.** Bar chart showing the fraction of CD8<sup>+</sup> T cells in the pseudotime starting node (CD8\_TCF7 dense) or pooled terminal nodes (CD8\_MKI67, CD8\_CCR5) for each patient. Color is treatment group for the sample.

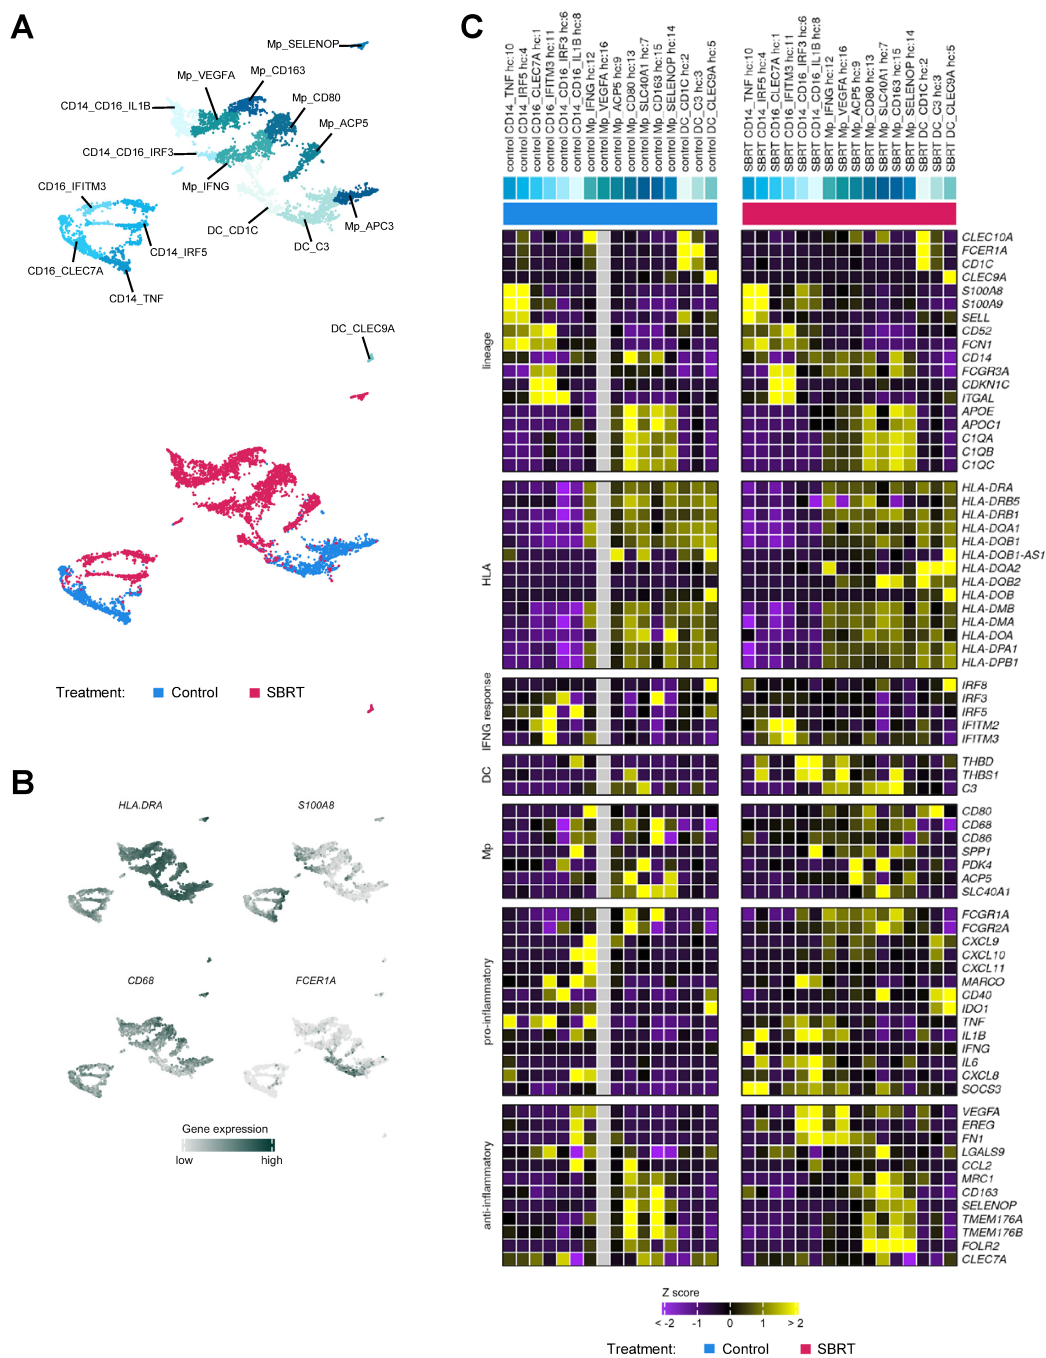

**Supplemental Figure 8. Subclassification of myeloid cells.** (A) UMAP recalculated for myeloid cells subset from the parent data. Top, myeloid cells reclustering into 16 subclusters. Bottom, distribution of cells by treatment group. (B) Localized gene expression for indicated genes within the myeloid UMAP. (C) Heatmaps showing expression of genes used for myeloid subclassification, divided by treatment group. Grey is no cells in the indicated subclass.



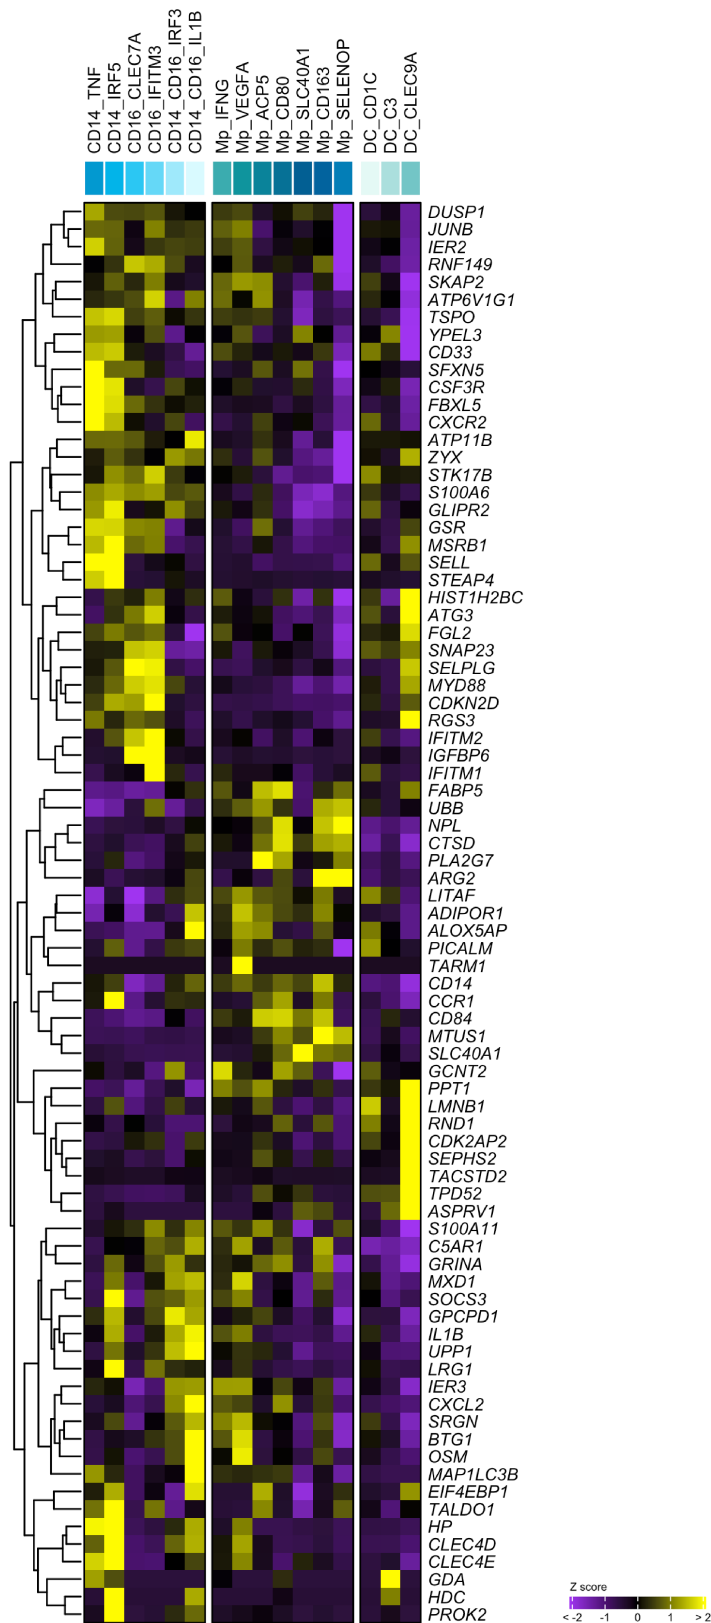

**Supplemental Figure 9. MDSC gene signature in myeloid subclasses.** Heatmap showing expression of MDSC signature genes across all identified myeloid subclasses.

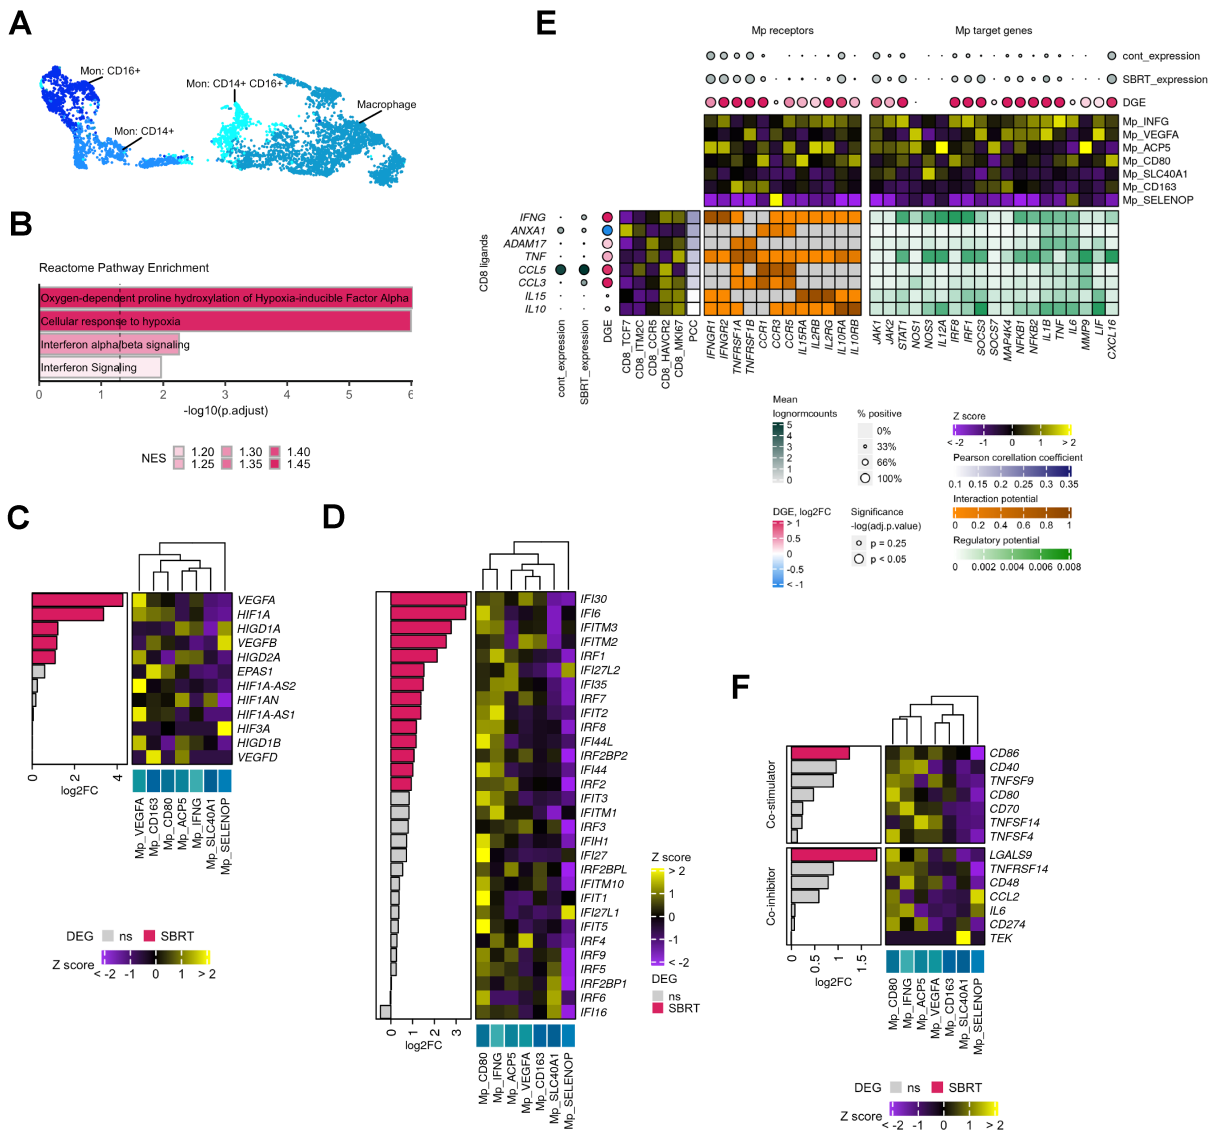

**Supplemental Figure 10. Analysis of macrophage subclasses.** (A) Macrophages subset from monocyte and macrophage parent data. (B) GSEA of Reactome pathways. Opacity is NES. All shown pathways are significant,  $p_{adj} < 0.05$ . (C) Heatmap showing expression of indicated hypoxia associated genes by macrophage subclasses. Columns are clustered by gene expression. Bar graph shows log<sub>2</sub>FC by treatment group. Color is differential gene expression, log<sub>2</sub>FC > 1;  $p_{adj} < 0.05$ . (D) Heatmap showing expression of indicated interferon response genes by macrophage subclasses. Columns are clustered by gene expression. Bar graph shows log<sub>2</sub>FC by treatment group. Color is differential gene expression, log<sub>2</sub>FC > 1;  $p_{adj} < 0.05$ . (E) Predicted interactions from CD8 ligands to macrophage receptors and target genes. CD8 ligands are ordered by decreasing correlation to target gene expression, PCC. Z score and DGE are calculated separately for either the CD8<sup>+</sup> T cells or macrophage subsets. (F) Heatmap showing expression of indicated co-stimulatory and co-inhibitory genes by macrophage subclasses. Columns are clustered by gene expression. Bar graph shows log<sub>2</sub>FC by treatment group. Color is differential gene expression, log<sub>2</sub>FC > 1;  $p_{adj} < 0.05$ .

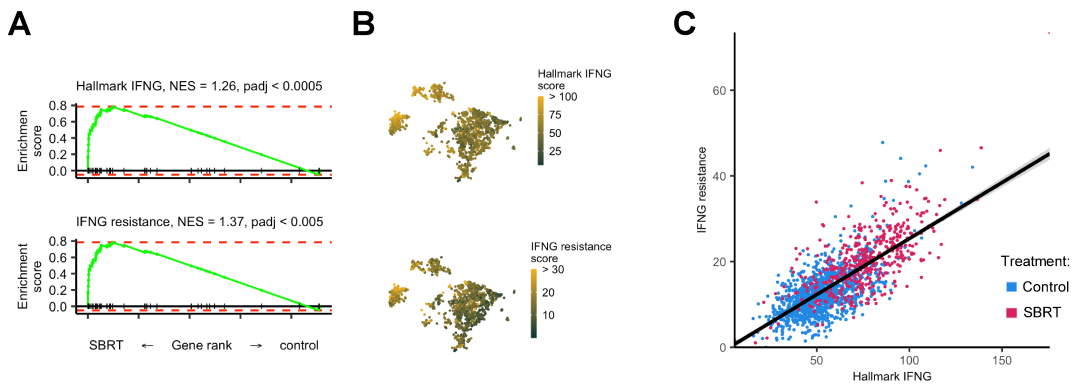

**Supplemental Figure 11. Analysis of hallmark IFNG and IFNG resistance gene signatures in tumor cells.** (A) GSEA of hallmark IFNG response and IFNG resistance pathways.<sup>36</sup> (B) Localization of hallmark IFNG and resistance signal by tumor cell t-SNE coordinates. (C) Dot plot showing hallmark IFNG response score versus IFNG resistance score with linear regression. Color is treatment group.

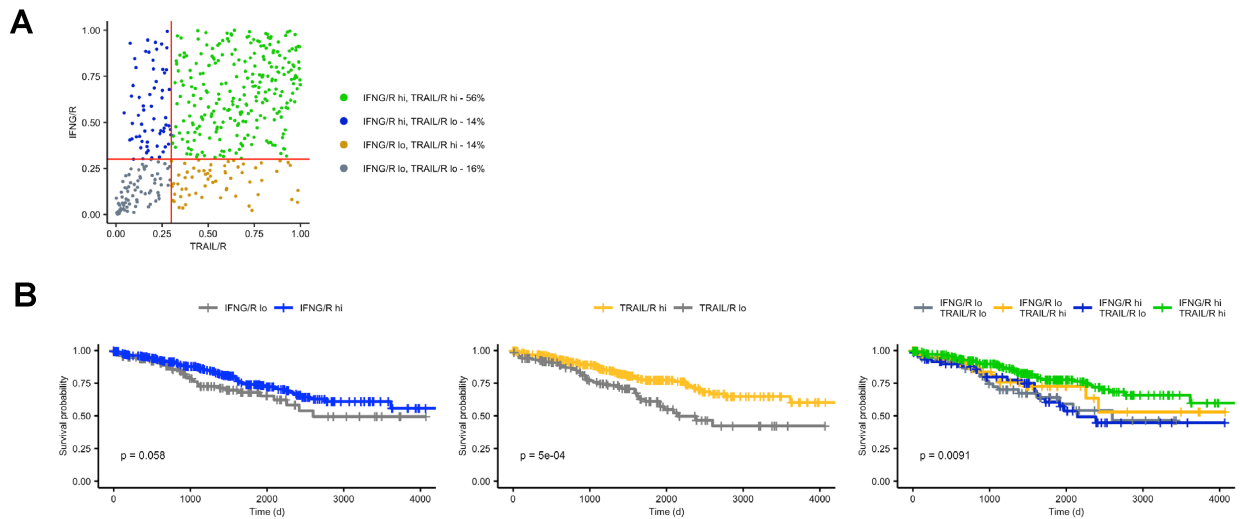

**Supplemental Figure 12. Analysis of potential IFNG and TRAIL ligand to receptor interactions for RCC patient survival and ICB treatment response.** Figure S12A-B analyze TCGA-KIRC primary tumors for stages I-III. (A) Dot plot showing distribution of TCGA patient tumors by TRAIL/Trail receptor and IFNG/IFNG receptor. Red lines show thresholds from hi and lo designations. Color is classification. (B) Kaplan-Meier curves comparing cross sections of samples from Figure S12A. Left: IFNG/R hi vs. low (right vs. left of vertical line); hazard ratio of IFNG/R hi = 0.68. Middle: TRAIL/R hi vs. low (above vs. below horizontal line); hazard ratio of TRAIL/R hi = 0.54. Right: Mixed effect model of IFNG/R score + TRAIL/R score; hazard ratio of IFNG/R hi = 0.8; hazard ratio of TRAIL/R hi = 0.57.

| Patient    | Treatment | Sex | Age | Path (T) Stage | Histology  | scRNA Seq | Spectral Flow Cytometry |
|------------|-----------|-----|-----|----------------|------------|-----------|-------------------------|
| <b>C1</b>  | Control   | F   | 79  | 1B             | Clear Cell | x         |                         |
| <b>C3</b>  | Control   | F   | 53  | 1B             | Clear Cell |           | x                       |
| <b>C4</b>  | Control   | M   | 63  | 3A             | Clear Cell |           | x                       |
| <b>C5</b>  | Control   | F   | 61  | 1B             | Clear Cell |           | x                       |
| <b>C6</b>  | Control   | M   | 55  | 2B             | Clear Cell |           | x                       |
| <b>C7</b>  | Control   | M   | 53  | 3              | Clear Cell |           | x                       |
| <b>C8</b>  | Control   | M   | 70  | 1B             | Clear Cell |           | x                       |
| <b>C23</b> | Control   | M   | 67  | 1B             | Clear Cell | x         |                         |
| <b>P1</b>  | SBRT      | M   | 53  | 2A             | Clear Cell |           | x                       |
| <b>P5</b>  | SBRT      | M   | 67  | 3A             | Clear Cell | x         | x                       |
| <b>P7</b>  | SBRT      | M   | 67  | 3A             | Clear Cell |           | x                       |
| <b>P10</b> | SBRT      | F   | 75  | 3A             | Clear Cell | x         |                         |
| <b>P14</b> | SBRT      | M   | 62  | 3A             | Clear Cell | x         | x                       |
| <b>P15</b> | SBRT      | F   | 57  | 2A             | Clear Cell | x         | x                       |

**Supplemental Table 1. Patient demographic and clinical characteristics.**

List of patients, their treatment method, demographics (sex and age), pathology, histology, and the method of analysis.

| Sl. No. | Marker    | Clone    | Fluorochrome    | Dilution | Supplier     | Catalog#    |
|---------|-----------|----------|-----------------|----------|--------------|-------------|
| 1       | CCR5      | 2D7      | BUV395          | 1 in 50  | BD           | 565224      |
| 2       | Live/Dead |          | LIVE/DEAD™ Blue | 1 in 500 | ThermoFisher | L34962      |
| 3       | CD31      | L1331.1  | BUV496          | 1 in 200 | BD           | 749833      |
| 4       | CD14      | MφP9     | BUV563          | 1 in 100 | BD           | 741441      |
| 5       | CD261     | S35-934  | BUV615          | 1 in 50  | BD           | 752308      |
| 6       | CD11c     | B-ly6    | BUV661          | 1 in 200 | BD           | 612967      |
| 7       | CD56      | NCAM16.2 | BUV737          | 1 in 200 | BD           | 612766      |
| 8       | CD45RO    | UCHL1    | BUV805          | 1 in 100 | BD           | 748367      |
| 9       | CD68      | Y1/82A   | BV421           | 1 in 50  | BD           | 564943      |
| 10      | CD27      | O323     | SB436           | 1 in 200 | ThermoFisher | 62-0279-42  |
| 11      | CD8       | SK1      | Pacific Blue    | 1 in 200 | Biolegend    | 980906      |
| 12      | KI67      | B56      | BV480           | 1 in 50  | BD           | 566109      |
| 13      | CD204     | U23-56   | BV510           | 1 in 50  | BD           | 742439      |
| 14      | CD4       | RPA-T4   | Pacific Orange  | 1 in 100 | ThermoFisher | 79-0049-42  |
| 15      | CD28      | CD28.2   | BV605           | 1 in 100 | Biolegend    | 302967      |
| 16      | CXCR3     | G025H7   | BV650           | 1 in 50  | Biolegend    | 353729      |
| 17      | CCR6      | G034E3   | BV711           | 1 in 100 | Biolegend    | 353435      |
| 18      | CCR4      | 1G1      | BV750           | 1 in 50  | BD           | 746980      |
| 19      | CCR7      | G043H7   | BV785           | 1 in 50  | Biolegend    | 353229      |
| 20      | CD57      | NK-1     | FITC            | 1 in 200 | BD           | 555619      |
| 21      | CD3       | SK-7     | Spark Blue 550  | 1 in 100 | Biolegend    | 344852      |
| 22      | CD45      | 2D1      | Nova Blue 610   | 1 in 100 | ThermoFisher | H005T03B05  |
| 23      | PD-1      | EH12.1   | PerCP-Cy5.5     | 1 in 50  | BD           | 561273      |
| 24      | LAG3      | 3DS223H  | PerCP-eFluor710 | 1 in 50  | ThermoFisher | 46-2239-42  |
| 25      | TOX       | REA473   | PE              | 1 in 50  | Miltenyi     | 130-120-716 |
| 26      | TIGIT     | A15153G  | PE/Dazzle 594   | 1 in 50  | Biolegend    | 372716      |
| 27      | CD25      | M-A251   | PE-Fire/640     | 1 in 50  | Biolegend    | 356148      |
| 28      | CD33      | HIM3-4   | PE-Cy5          | 1 in 100 | ThermoFisher | 15-0339-42  |
| 29      | CD127     | A019D5   | PE-Fire 700     | 1 in 100 | Biolegend    | 351366      |
| 30      | CD253     | RIK-2    | PE Cy7          | 1 in 50  | Biolegend    | 308216      |
| 31      | TIM3      | F38-2E2  | APC             | 1 in 50  | ThermoFisher | 62-3109-42  |
| 32      | CD45RA    | HI100    | Spark NIR 685   | 1 in 200 | Biolegend    | 304168      |
| 33      | CX3CR1    | G025H7   | R718            | 1 in 50  | Biolegend    | 353730      |
| 34      | CD38      | HIT2     | APC-eFluor780   | 1 in 200 | ThermoFisher | 47-0389-42  |
| 35      | HLA-DR    | L243     | APC/Fire 810    | 1 in 100 | Biolegend    | 307674      |

**Supplemental Table 2. Antibody panel details.** List of antibodies, clones, fluorochromes, dilutions, manufacturer, and catalog numbers used in spectral flow cytometry analysis.

| Patients | Cluster frequencies of major cell subsets in each patient |                  |        |         |       |                   |
|----------|-----------------------------------------------------------|------------------|--------|---------|-------|-------------------|
|          | CD8 <sup>+</sup>                                          | CD4 <sup>+</sup> | T-regs | Myeloid | NK    | CD45 <sup>+</sup> |
| C3       | 50.3%                                                     | 20.2%            | 2.9%   | 8.9%    | 15.7% | 2.0%              |
| C4       | 18.1%                                                     | 16.5%            | 2.8%   | 41.7%   | 17.3% | 3.5%              |
| C5       | 18.6%                                                     | 16.0%            | 2.6%   | 14.9%   | 20.2% | 27.6%             |
| C6       | 26.2%                                                     | 6.0%             | 0.3%   | 32.3%   | 15.2% | 20.0%             |
| C7       | 19.3%                                                     | 18.5%            | 2.6%   | 30.2%   | 22.0% | 7.3%              |
| C8       | 18.8%                                                     | 16.5%            | 1.0%   | 47.7%   | 5.9%  | 10.1%             |
| P1       | 16.8%                                                     | 13.9%            | 1.1%   | 31.2%   | 10.5% | 26.5%             |
| P5       | 65.0%                                                     | 12.6%            | 3.0%   | 9.7%    | 2.0%  | 7.8%              |
| P7       | 19.4%                                                     | 24.2%            | 2.6%   | 11.5%   | 6.1%  | 36.4%             |
| P14      | 26.8%                                                     | 22.2%            | 5.3%   | 14.3%   | 13.6% | 17.8%             |
| P15      | 6.9%                                                      | 9.9%             | 0.7%   | 6.9%    | 1.7%  | 74.0%             |

0  100

Cluster Frequency (%)

**Supplemental Table 3. Cluster frequencies from spectral flow cytometry analysis.** Cluster frequencies for major cell subsets identified by spectral flow cytometry analysis in six control (C3, C4, C5, C6, C7, and C8) and five SBRT treated (P1, P5, P7, P14, and P15) patient samples.

| Patient    | Cluster frequencies for CD8 <sup>+</sup> T cells in each cluster identified by FlowSOM |        |       |        |        |       |        |        |        |       |        |        |        |        |        |
|------------|----------------------------------------------------------------------------------------|--------|-------|--------|--------|-------|--------|--------|--------|-------|--------|--------|--------|--------|--------|
|            | 1                                                                                      | 2      | 3     | 4      | 5      | 6     | 7      | 8      | 9      | 10    | 11     | 12     | 13     | 14     | 15     |
| <b>C3</b>  | 5.09%                                                                                  | 7.16%  | 0.48% | 0.79%  | 1.85%  | 2.71% | 1.66%  | 7.99%  | 2.33%  | 1.50% | 13.63% | 3.37%  | 27.94% | 11.32% | 12.17% |
| <b>C4</b>  | 0.90%                                                                                  | 0.82%  | 0.16% | 0.08%  | 2.19%  | 0.89% | 1.71%  | 9.99%  | 2.38%  | 0.93% | 9.90%  | 1.60%  | 57.43% | 6.95%  | 4.05%  |
| <b>C5</b>  | 1.52%                                                                                  | 1.55%  | 0.10% | 0.34%  | 0.97%  | 3.36% | 0.66%  | 25.36% | 1.82%  | 1.91% | 30.30% | 0.79%  | 10.17% | 2.29%  | 18.84% |
| <b>C6</b>  | 2.02%                                                                                  | 13.00% | 4.57% | 30.94% | 17.37% | 1.49% | 0.84%  | 3.64%  | 13.17% | 2.63% | 3.24%  | 0.79%  | 3.87%  | 0.86%  | 1.58%  |
| <b>C7</b>  | 9.16%                                                                                  | 1.81%  | 0.49% | 7.05%  | 1.15%  | 9.44% | 1.37%  | 11.10% | 3.80%  | 1.75% | 8.69%  | 1.02%  | 35.17% | 4.34%  | 3.66%  |
| <b>C8</b>  | 38.54%                                                                                 | 16.42% | 1.12% | 5.10%  | 3.30%  | 3.01% | 0.67%  | 3.61%  | 3.80%  | 4.04% | 9.81%  | 1.13%  | 6.41%  | 0.66%  | 2.37%  |
| <b>P1</b>  | 3.85%                                                                                  | 12.28% | 2.09% | 3.14%  | 2.27%  | 2.15% | 1.15%  | 8.18%  | 3.01%  | 2.62% | 8.39%  | 2.06%  | 24.30% | 11.20% | 13.32% |
| <b>P5</b>  | 1.59%                                                                                  | 3.79%  | 2.69% | 1.38%  | 3.38%  | 0.23% | 0.32%  | 1.21%  | 0.33%  | 2.10% | 2.91%  | 10.85% | 8.85%  | 8.14%  | 52.21% |
| <b>P7</b>  | 4.71%                                                                                  | 1.63%  | 2.33% | 5.28%  | 2.44%  | 1.85% | 12.39% | 12.08% | 2.27%  | 1.34% | 5.06%  | 2.31%  | 12.63% | 21.45% | 12.23% |
| <b>P14</b> | 9.97%                                                                                  | 5.77%  | 5.73% | 0.51%  | 3.80%  | 0.89% | 2.77%  | 7.97%  | 1.43%  | 2.72% | 6.55%  | 7.90%  | 6.68%  | 11.68% | 25.62% |
| <b>P15</b> | 3.16%                                                                                  | 8.13%  | 4.41% | 5.52%  | 5.42%  | 2.54% | 7.43%  | 6.26%  | 1.29%  | 2.30% | 9.60%  | 4.46%  | 8.25%  | 8.44%  | 22.79% |

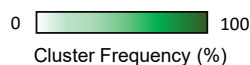

**Supplemental Table 4. Cluster frequencies of CD8<sup>+</sup> T cells from spectral flow cytometry analysis.** Cluster frequencies for CD8<sup>+</sup> T cell clusters identified by spectral flow cytometry analysis in six control (C3, C4, C5, C6, C7, and C8) and five SBRT treated (P1, P5, P7, P14, and P15) samples.



| Sub class  | Raw cell numbers |      |     |     |     |      |
|------------|------------------|------|-----|-----|-----|------|
|            | C1               | C23  | P10 | P14 | P15 | P5   |
| CD4_ANXA1  | 3170             | 165  | 188 | 37  | 233 | 177  |
| CD4_FOS    | 157              | 654  | 430 | 576 | 746 | 704  |
| CD4_FOXP3  | 241              | 88   | 328 | 384 | 160 | 462  |
| CD4_MALAT1 | 161              | 6    | 179 | 91  | 96  | 89   |
| CD8_CCR5   | 25               | 6    | 84  | 112 | 67  | 338  |
| CD8_HAVCR2 | 202              | 178  | 252 | 463 | 150 | 3315 |
| CD8_ITM2C  | 164              | 46   | 142 | 179 | 182 | 958  |
| CD8_MKI67  | 26               | 42   | 76  | 165 | 32  | 604  |
| CD8_TCF7   | 728              | 111  | 25  | 140 | 24  | 27   |
| NK_FCGR3A  | 202              | 545  | 77  | 158 | 47  | 37   |
| NK_NCAM1   | 302              | 92   | 235 | 377 | 62  | 93   |
| NKT_GZMH   | 5                | 10   | 74  | 107 | 197 | 450  |
| NKT_GZMK   | 49               | 145  | 101 | 434 | 56  | 65   |
| NKT_KLRG1  | 58               | 1223 | 58  | 396 | 164 | 29   |

**Supplemental Table 5. Single-cell RNA sample composition.** Raw cell numbers for distinct T and NK cell subclasses identified in control (C1 and C23) and SBRT treated (P10, P14, P15, and P5) patients by single-cell RNA seq analysis.
